# Supplementary material for: A hydrophobic–superoleophilic 2D Zr-based alkyne-rich metal–organic framework for oil/water separation and solar-assisted oil evaporation
Source: Royal Society of Chemistry journal article supplement (doi:10.1039/d3ta05241a), 2023-01-01
Supplement: d3ta05241a1.pdf [file d3ta05241a1.pdf]

## Electronic Supplementary Information

### **A Hydrophobic-superoleophilic 2D Zr-based Alkyne-rich Metal-Organic Framework for Oil/Water Separation and Solar-assisted Oil Evaporation**

*Qian-Ru Luo<sup>§</sup>, Yuan-Hui Zhong<sup>§</sup>, Lai-Hon Chung\*, Zhixin Jiang, Qia-Chun Lin, Xin-  
Ke Xu, Xinhe Ye, Wei-Ming Liao and Jun He\**

*School of Chemical Engineering and Light Industry, Guangdong University of Tech-  
nology, Guangzhou 510006, China*

\* Corresponding author.

E-mail: junhe@gdut.edu.cn, laihonchung@gdut.edu.cn

<sup>§</sup>*These authors contributed equally.*

## Table of contents

|                                                                                                                                                                       |        |
|-----------------------------------------------------------------------------------------------------------------------------------------------------------------------|--------|
| <b>General procedure.</b>                                                                                                                                             | S4     |
| <b>Scheme S1.</b> The synthetic scheme for H <sub>2</sub> L1.                                                                                                         | S5     |
| <b>Experimental procedures.</b>                                                                                                                                       | S5-S11 |
| <b><sup>1</sup>H and <sup>13</sup>C NMR spectra of the ligand H<sub>2</sub>L1 and intermediates.</b>                                                                  | S6-S11 |
| <b>Fig. S1.</b> The <sup>1</sup> H NMR spectrum of SM3.                                                                                                               | S6     |
| <b>Fig. S2.</b> The <sup>13</sup> C NMR spectrum of SM3.                                                                                                              | S6     |
| <b>Fig. S3.</b> The <sup>1</sup> H NMR spectrum of SM4.                                                                                                               | S7     |
| <b>Fig. S4.</b> The <sup>13</sup> C NMR spectrum of SM4.                                                                                                              | S7     |
| <b>Fig. S5.</b> The <sup>1</sup> H NMR spectrum of SM5.                                                                                                               | S8     |
| <b>Fig. S6.</b> The <sup>13</sup> C NMR spectrum of SM5.                                                                                                              | S8     |
| <b>Fig. S7.</b> The <sup>1</sup> H NMR spectrum of Me <sub>2</sub> L1.                                                                                                | S9     |
| <b>Fig. S8.</b> The <sup>13</sup> C NMR spectrum of Me <sub>2</sub> L1.                                                                                               | S9     |
| <b>Fig. S9.</b> The <sup>1</sup> H NMR spectrum of H <sub>2</sub> L1.                                                                                                 | S10    |
| <b>Fig. S10.</b> The <sup>13</sup> C NMR spectrum of H <sub>2</sub> L1.                                                                                               | S10    |
| <b>Fig. S11.</b> A mass spectrum (ESI) of compound H <sub>2</sub> L1.                                                                                                 | S11    |
| <b>Synthesis and activation of ZrL1.</b>                                                                                                                              | S11    |
| <b>Structure simulation.</b>                                                                                                                                          | S11    |
| <b>Fig. S12.</b> FT-IR spectra of ligand, as made sample and activated sample of ZrL1.                                                                                | S12    |
| <b>Fig. S13.</b> <sup>1</sup> H NMR spectra of the filtrate of ZrL1 digested in HF/DMSO- <i>d</i> <sub>6</sub> and H <sub>2</sub> L1 in DMSO- <i>d</i> <sub>6</sub> . | S12    |
| <b>Fig. S14.</b> Thermogravimetric analysis plots of activated ZrL1 in N <sub>2</sub> and air.                                                                        | S12    |
| <b>Fig. S15.</b> N <sub>2</sub> sorption isotherm at 77 K and QSDFT analysis for ZrL1.                                                                                | S13    |
| <b>Fig. S16.</b> CO <sub>2</sub> sorption isotherm at 175 K and QSDFT analysis for ZrL1.                                                                              | S13    |
| <b>Fig. S17.</b> PXRD patterns of ZrL1 before and after gas sorption measurement.                                                                                     | S13    |
| <b>Fig. S18.</b> XPS spectra of ZrL1.                                                                                                                                 | S14    |
| <b>Fig. S19.</b> EDS elemental analysis results of ZrL1.                                                                                                              | S14    |
| <b>Fig. S20.</b> PXRD patterns of ZrL1 for chemical stability measurement.                                                                                            | S14    |
| <b>Fig. S21.</b> Photographs of the droplets of saline water, acidic solution, alkaline solution and dichloromethane on ZrL1 powder with contact angle values.        | S15    |
| <b>Fig. S22.</b> Photographs of droplet profiles on the surface of original PU Sponge with contact angle values.                                                      | S15    |
| <b>Fig. S23.</b> FT-IR spectra of ZrL1, PU and ZrL1@PU.                                                                                                               | S15    |
| <b>Table S1.</b> Loading of ZrL1@PU.                                                                                                                                  | S15    |
| <b>Fig. S24.</b> Kubelka-Munk-transformed reflectance spectra for solid samples of PU, ZrL1 and ZrL1@PU.                                                              | S16    |
| <b>Fig. S25.</b> The compression and detachment of organic droplets and water droplets on the surface of ZrL1@PU.                                                     | S16    |
| <b>Fig. S26.</b> Photographs of the droplets of saline water, acidic solution, alkaline solution on ZrL1@PU with contact angle values.                                | S16    |
| <b>Fig. S27.</b> SEM images of original PU Sponge and ZrL1@PU samples with different loadings of ZrL1.                                                                | S17    |
| <b>Fig. S28.</b> Organic solvent-absorption capacity of the ZrL1@PU.                                                                                                  | S17    |

|                                                                                                                                                                                                                                                                                                   |         |
|---------------------------------------------------------------------------------------------------------------------------------------------------------------------------------------------------------------------------------------------------------------------------------------------------|---------|
| <b>Fig. S29.</b> Photographs of ZrL1@PU.                                                                                                                                                                                                                                                          | S18     |
| <b>Table S2.</b> Absorption capacity, separation efficiency and flux densities of different kinds of oil.                                                                                                                                                                                         | S18     |
| <b>Fig. S30.</b> The separation efficiency of ZrL1@PU with different loading in dichloromethane/water mixture; dichloromethane/water mixture and dichloromethane/sea water mixture for 9 cycles of separation; ZrL1@PU in dichloromethane/water mixture as a function of operation time duration. | S19     |
| <b>Fig. S31.</b> The dichloromethane-water mixture separation process.                                                                                                                                                                                                                            | S19     |
| <b>Fig. S32.</b> The ethyl acetate-water mixture separation process.                                                                                                                                                                                                                              | S20     |
| <b>Fig. S33.</b> Photothermal conversion behaviour of ZrL1.                                                                                                                                                                                                                                       | S20     |
| <b>Fig. S34.</b> Schematic diagram of photo-driven solvent evaporation experimental set-up.                                                                                                                                                                                                       | S21     |
| <b>Fig. S35.</b> Photo-driven distillation tests of ZrL1@PU.                                                                                                                                                                                                                                      | S21     |
| <b>Fig. S36.</b> FT-IR spectra and PXRD patterns of ZrL1 recovered from ZrL1@PU after five photothermal conversion cycles, oil/water separation and solvent evaporation experiment.                                                                                                               | S22     |
| <b>Table S3.</b> Comparisons of absorption capacities and separation efficiency of previously reported absorbents with ZrL1@PU.                                                                                                                                                                   | S22-S23 |
| <b>References.</b>                                                                                                                                                                                                                                                                                | S24     |

**General procedure.**

All the starting materials, reagents, and solvents were purchased from commercial sources (J&K, Zhengzhou Alfa and Acros) and used without additional purification. Elemental analysis was obtained with a Elementar Vario EL cube elemental analyser. Powder X-ray diffraction (PXRD) patterns were collected on a Rigaku Smart lab diffractometer with Cu K $\alpha$  radiation ( $\lambda = 1.5418 \text{ \AA}$ ) at room temperature. The X-ray tube operated at a voltage of 40 kV and a current of 15 mA. FT-IR spectra (KBr pellet) in the range 400–4000  $\text{cm}^{-1}$  were recorded on a Thermo Fisher iS50R FT-IR spectrophotometer. Solution  $^1\text{H}$  NMR and  $^{13}\text{C}$  NMR spectra were recorded on a 400 MHz Bruker superconducting magnet high-field NMR spectrometer at room temperature, with tetramethylsilane (TMS) as the internal standard. Chemical shifts ( $\delta$ ) are expressed in ppm relative to the residual solvent (*e.g.*, chloroform  $^1\text{H}$ : 7.26 ppm,  $^{13}\text{C}$ : 77.0 ppm) reference. Coupling constants are expressed in hertz (Hz). XPS spectra was carried out by a SACEnning Auger/X-ray Photoelectron Spectroscopy System (PHI 5802). Thermogravimetric analysis (TGA) was carried out on a Netzsch STA449F5 thermal analyser from 30  $^\circ\text{C}$  to 900  $^\circ\text{C}$  at a heating rate of 10  $^\circ\text{C min}^{-1}$  under  $\text{N}_2$  atmosphere. The sample was then held at vacuum until the analysis was run. The porosity and surface area analysis were performed using a Quantachrome Autosorb iQ gas sorption analyser. The sample was outgassed at 0.03 torr with a 5  $^\circ\text{C}/\text{min}$  ramp to 100  $^\circ\text{C}$  and held at this temperature for 12 hours. The sample was then held at vacuum until the analysis was run. Pawley refinement was carried out using Materials Studio Software. The morphology of the samples was investigated using scanning electron microscopy (SEM, SIGMA 500, ZEISS, Germany). All the water contact angle measurements were carried out by Hol-marc, HO-IOD-CAN-018 equipment. Diffuse reflection spectra were collected in the UV-visible near infra-red spectrophotometer with Integrating Sphere (SHIMADZU UV-3600 Plus).

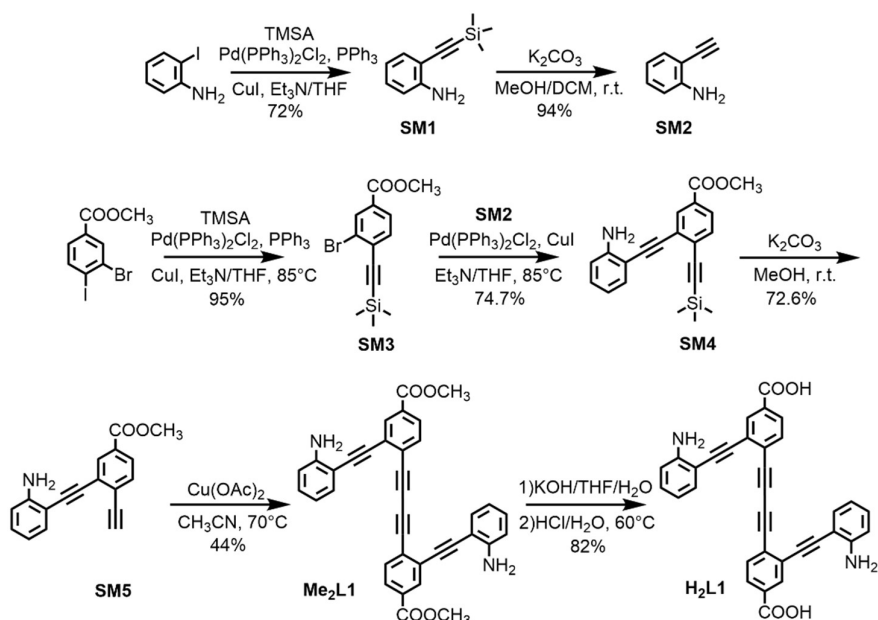

**Scheme S1.** The synthetic scheme for H<sub>2</sub>L1.

## Experimental procedures.

### Synthesis of 2-((trimethylsilyl)ethynyl)aniline (SM1), 2-ethynylaniline (SM2).

SM1 and SM2 were prepared in accordance with previously reported procedure<sup>1</sup>. The <sup>1</sup>H NMR and <sup>13</sup>C NMR spectra were in agreement with the literature.

### Synthesis of methyl 3-bromo-4-((trimethylsilyl)ethynyl)benzoate (SM3).

Methyl 3-bromo-4-iodobenzoate (5.0 g, 14.7 mmol), triphenylphosphine (384.65 mg, 1.5 mmol), bis(triphenylphosphine) palladium(II) chloride (308.8 mg, 0.43 mmol) and copper(I) iodide (83.8 mg, 0.43 mmol) were added to 25 mL pressure tube. Triethylamine (4 mL) and tetrahydrofuran (THF, 4 mL) each previously purged by bubbling N<sub>2</sub> gas for 5 minutes, were then transferred into the tube *via* a cannula. Under the N<sub>2</sub> atmosphere, trimethylsilylacetylene (TMSA, 1.73 g, 17.6 mmol) was added, sealed and reacted at 85 °C for 3 hours. After cooling to room temperature, the solvents were removed by a rotary evaporation and the residue was purified by silica gel column chromatography (eluent: petroleum ether/ethyl acetate, 20:1, v/v) to yield compound SM3 as yellow solid (4.33 g, 95% yield based on raw materials). <sup>1</sup>H NMR (400 MHz, CDCl<sub>3</sub>): δ = 8.22 (s, 1H), 7.89 (d, 1H), 7.53 (d, 1H), 3.91 (s, 3H), 0.28 (s, 9H). <sup>13</sup>C NMR (100 MHz, CDCl<sub>3</sub>): δ = 165.27, 133.40, 133.37, 130.92, 129.64, 127.90, 125.69, 103.33, 102.44, 52.51, -0.21.

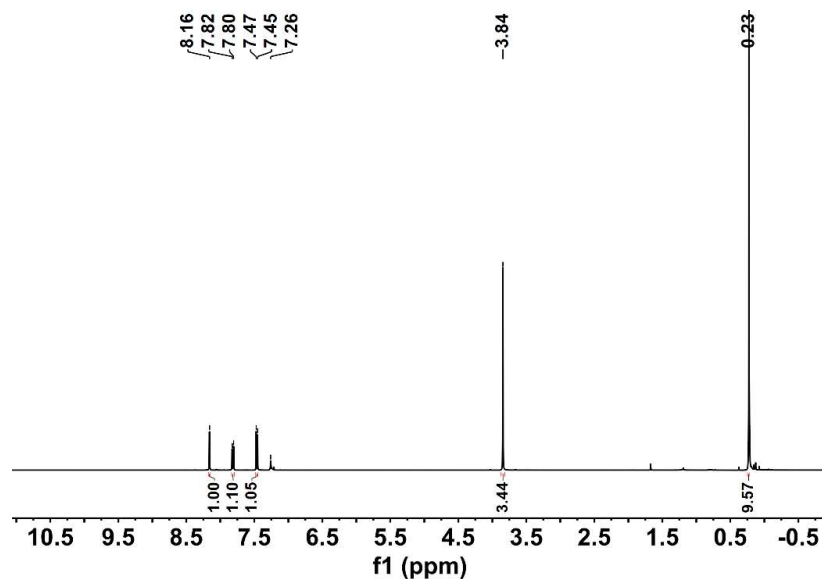

Fig. S1. The  $^1\text{H}$  NMR spectrum of **SM3** ( $\text{CDCl}_3$ , 400 MHz).

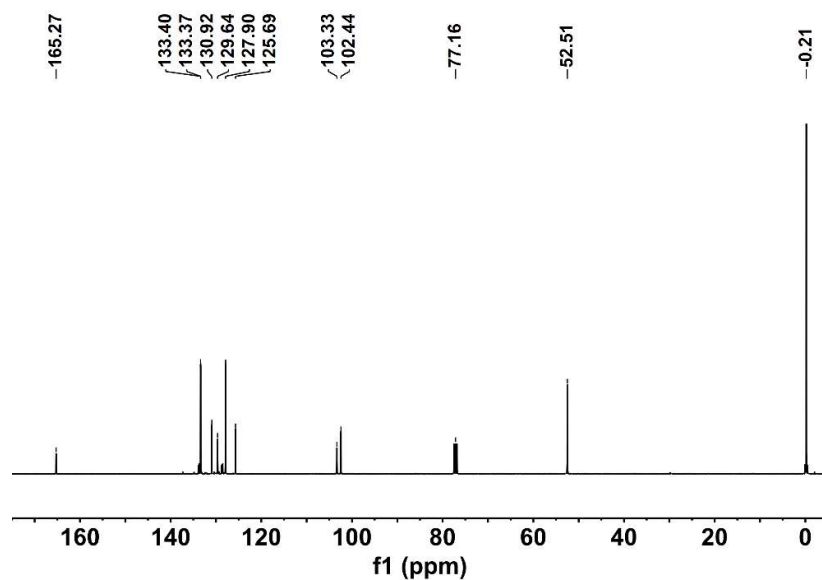

Fig. S2. The  $^{13}\text{C}$  NMR spectrum of **SM3** ( $\text{CDCl}_3$ , 100 MHz).

#### Synthesis of methyl 3-((2-aminophenyl)ethynyl)-4-((trimethylsilyl)ethynyl)benzoate (**SM4**).

A mixture of compound **SM3** (2.0 g, 6.4 mmol), compound **SM2** (3.76 g, 32.1 mmol), bis(triphenylphosphine) palladium(II) chloride (135.3 mg, 0.2 mmol), and copper(I) iodide (36.7 mg, 0.2 mmol) were added to a 50-mL Schlenk tube and then the tube was connected to a vacuum manifold, evacuated and back-filled with  $\text{N}_2$  gas for three times. Triethylamine (14 mL) and THF (7 mL), each previously purged by bubbling  $\text{N}_2$  gas for 5 minutes, were then transferred into the tube *via* a cannula. The tube was screw-capped and the reaction solution was stirred at 85  $^\circ\text{C}$  under  $\text{N}_2$  protection for 7 hours. After cooling to room temperature, the solvents were removed by a rotary evaporation and the residue was purified by silica gel column

chromatography (eluent: *n*-hexane/ethyl acetate, 10:1, v/v) to yield compound **SM4** as orange oily liquid (1.67 g, 74.7% yield based on compound **SM3**).  $^1\text{H}$  NMR (400 MHz,  $\text{CDCl}_3$ ):  $\delta$  = 8.19 (s, 1H), 7.91 (d, 1H), 7.58 (d, 1H), 7.41 (d, 1H), 7.16 (t, 1H), 6.74 (d, 1H), 6.70 (t, 1H), 3.93 (s, 3H), 0.29 (s, 9H).  $^{13}\text{C}$  NMR (100 MHz,  $\text{CDCl}_3$ ):  $\delta$  = 166.00, 148.30, 132.83, 132.66, 132.34, 130.35, 129.87, 129.01, 128.35, 126.34, 117.82, 114.31, 107.25, 103.50, 101.88, 92.76, 91.34, 52.44, 0.05.

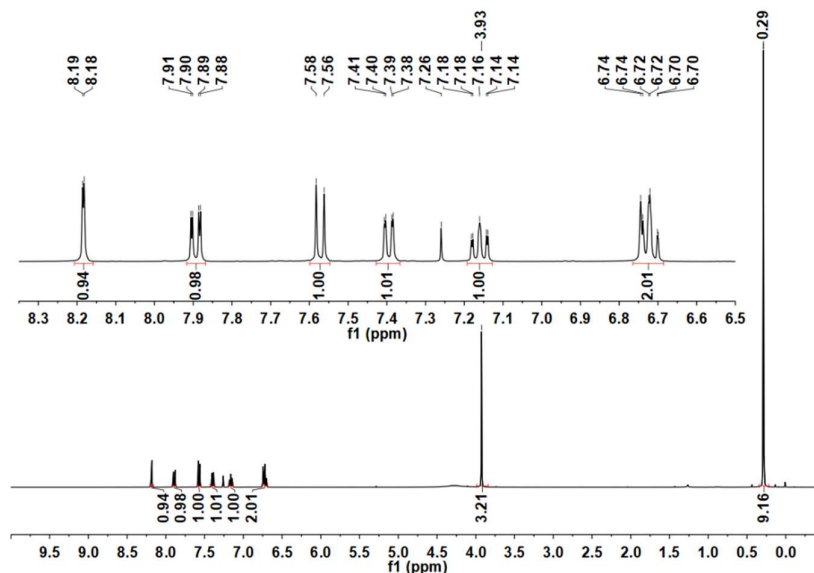

Fig. S3. The  $^1\text{H}$  NMR spectrum of **SM4** ( $\text{CDCl}_3$ , 400 MHz).

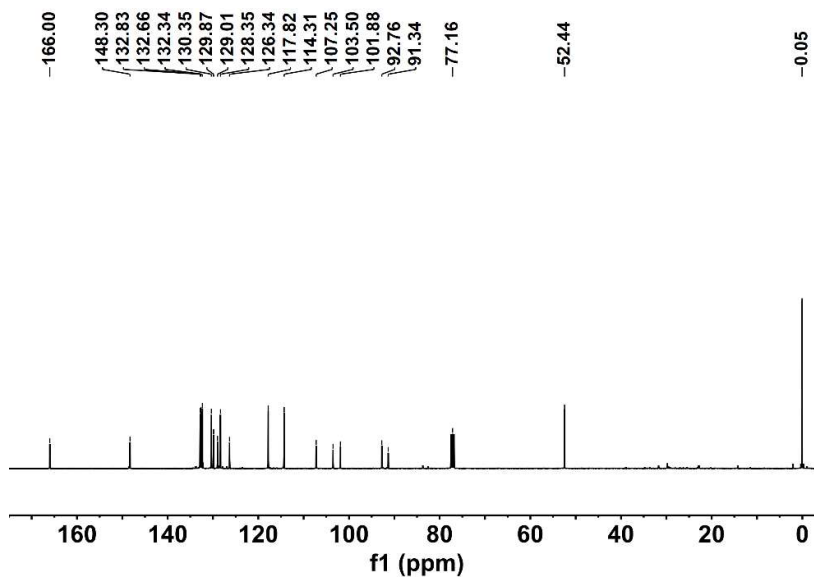

Fig. S4. The  $^{13}\text{C}$  NMR spectrum of **SM4** ( $\text{CDCl}_3$ , 100 MHz).

#### Synthesis of methyl 3-((2-aminophenyl)ethynyl)-4-ethynylbenzoate (**SM5**).

A 50-mL round-bottom flask was charged with compound **SM4** (1.5 g, 4.3 mmol), anhydrous  $\text{K}_2\text{CO}_3$  (1.79 g, 12.9 mmol) and a magnetic stirring bar.  $\text{CH}_2\text{Cl}_2$  (10 mL) and methanol (10 mL) were added into the flask, and the reaction mixture was stirred at room temperature overnight.

Then the solvent was removed on a rotary evaporator and the residue was then dissolved in  $\text{CH}_2\text{Cl}_2$ . The organic mixture was extracted with  $\text{CH}_2\text{Cl}_2$  ( $3 \times 50$  mL), washed with distilled water ( $3 \times 100$  mL) to remove the  $\text{K}_2\text{CO}_3$ , dried over anhydrous  $\text{Na}_2\text{SO}_4$  and the solvent was removed by rotary evaporation to obtain compound **SM5** as red oily liquid (861 mg, 94.1% yield based on **SM4**).  $^1\text{H}$  NMR (400 MHz,  $\text{CDCl}_3$ ):  $\delta$  = 8.13 (s, 1H), 7.85 (d, 1H), 7.53 (d, 1H), 7.33 (d, 1H), 7.09 (t, 1H), 6.66 (d, 1H), 6.64 (t, 1H), 3.86 (s, 3H), 3.43 (s, 1H).  $^{13}\text{C}$  NMR (100 MHz,  $\text{CDCl}_3$ ):  $\delta$  = 165.99, 148.52, 132.82, 132.49, 132.33, 130.51, 130.40, 128.45, 127.95, 127.01, 117.95, 114.42, 107.20, 92.55, 91.63, 83.70, 82.58, 77.16, 52.59.

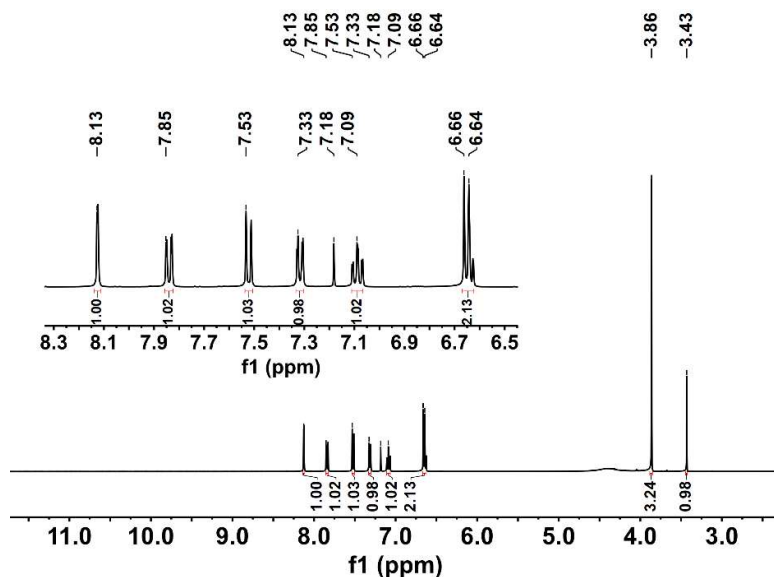

Fig. S5. The  $^1\text{H}$  NMR spectrum of **SM5** ( $\text{CDCl}_3$ , 400 MHz).

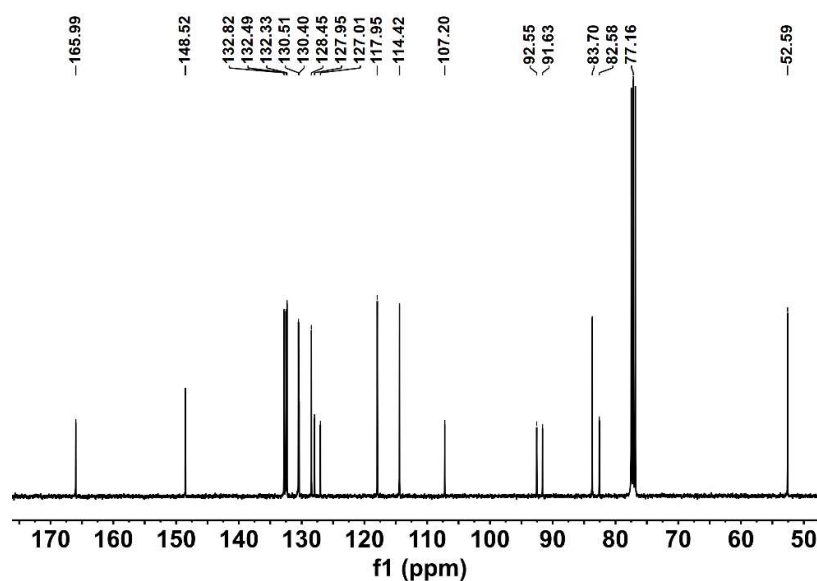

Fig. S6. The  $^{13}\text{C}$  NMR spectrum of **SM5** ( $\text{CDCl}_3$ , 100 MHz).



**Synthesis of dimethyl 4,4'-(buta-1,3-diyne-1,4-diy)bis(3-((2-aminophenyl)ethynyl)benzoate) (Me<sub>2</sub>L1).**

A 50-mL round-bottom flask was charged with compound **SM5** (800 mg, 2.9 mmol) and anhydrous copper(II) acetate (1.58 g, 8.72 mmol). 20 mL acetonitrile were added into the flask and reacted at 70 °C. At the end of the reaction, the green solid mixture was obtained by rotary steaming, washed with deionized water (3 × 200 mL) and extracted by CH<sub>2</sub>Cl<sub>2</sub> (3 × 100 mL), dried over anhydrous Na<sub>2</sub>SO<sub>4</sub> and the solvent was removed by rotary evaporation. The residue was purified by silica gel column chromatography (eluent: *n*-hexane/ethyl acetate, 4:1, v/v) to yield compound Me<sub>2</sub>L1 as the orange solid (701.4 mg, 44% yield based on **SM5**). <sup>1</sup>H NMR (400 MHz, CDCl<sub>3</sub>): δ = 8.22 (s, 2H), 7.95 (d, 2H), 7.65 (d, 2H), 7.39 (d, 2H), 7.05 (t, 2H), 6.64 (t, 2H), 6.52 (d, 2H), 3.95 (s, 6H). <sup>13</sup>C NMR (100 MHz, CDCl<sub>3</sub>): δ = 165.72, 148.55, 133.13, 132.57, 132.22, 130.76, 130.55, 128.31, 127.62, 126.94, 117.73, 114.41, 106.45, 92.53, 92.28, 82.91, 79.32, 77.05, 52.58, 29.72.

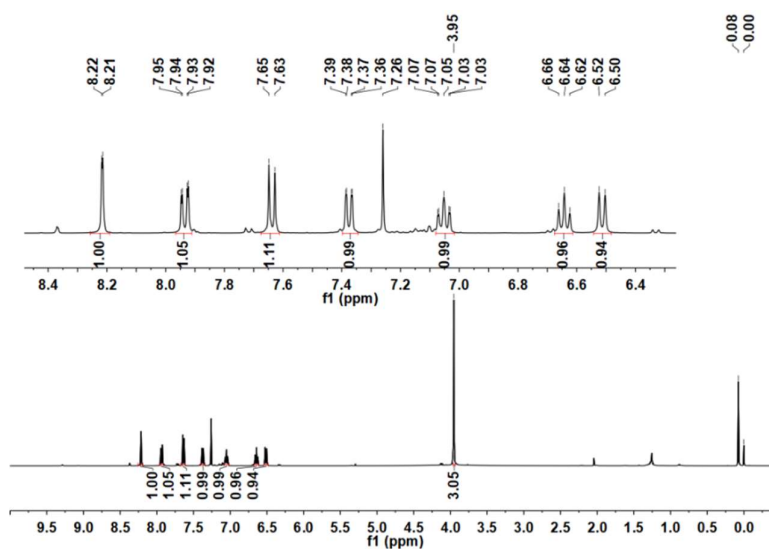

Fig. S7. The <sup>1</sup>H NMR spectrum of Me<sub>2</sub>L1 (CDCl<sub>3</sub>, 400 MHz).

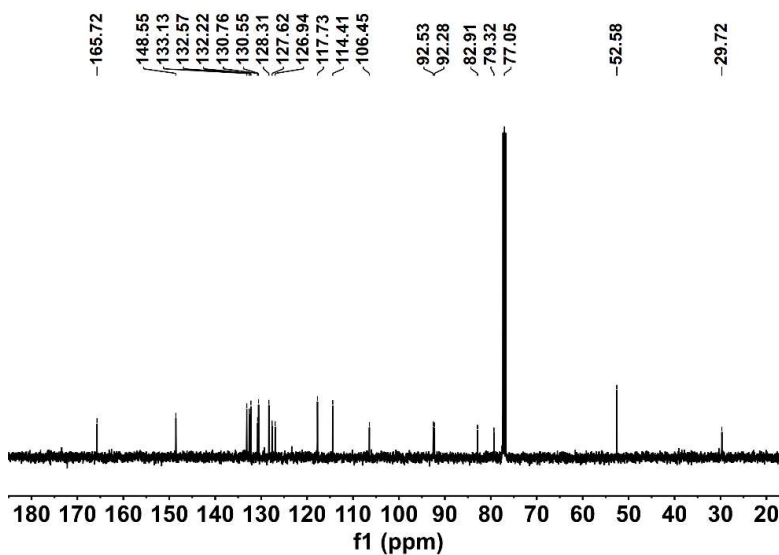

Fig. S8. The <sup>13</sup>C NMR spectrum of Me<sub>2</sub>L1 (CDCl<sub>3</sub>, 100 MHz).

### Synthesis of 4,4'-(buta-1,3-diyne-1,4-diyl)bis(3-((2-aminophenyl)ethynyl)benzoic acid) (H<sub>2</sub>L1).

In a round bottom flask, Me<sub>2</sub>L1 (500 mg, 0.911 mmol) and KOH (18 mg, 18.22 mmol) were added. THF (10 mL) and deionized water (10 mL) were then added, and the reaction was stirred at 60°C for 24 hours. After cooling to room temperature, the resulting red solid mixture was obtained by removing the solvent using a rotary evaporator, and deionized water was added to the mixture, followed by the slow addition of HCl solution under stirring until the pH reached 2. The mixture was then filtered and washed with deionized water (3 × 200 mL), and finally vacuum dried. The product H<sub>2</sub>L1 was obtained as the orange solid (388.6 mg, 82% yield based on Me<sub>2</sub>L1). <sup>1</sup>H NMR (400 MHz, DMSO-*d*<sub>6</sub>): δ = 8.28 (s, 2H), 7.95 (d, 2H), 7.87 (d, 2H), 7.32 (d, 2H), 7.11 (t, 2H), 6.78 (d, 2H), 6.53 (t, 2H). <sup>13</sup>C NMR (100 MHz, DMSO-*d*<sub>6</sub>): δ = 166.06, 148.43, 133.46, 132.28, 132.00, 130.70, 128.61, 127.11, 125.66, 117.15, 115.06, 105.65, 92.81, 91.67, 82.48, 78.69.

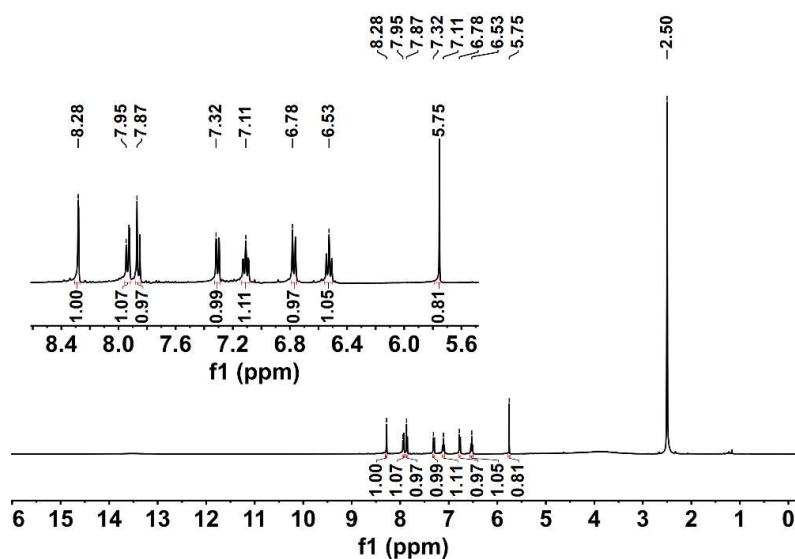

Fig. S9. The <sup>1</sup>H NMR spectrum of H<sub>2</sub>L1 (DMSO-*d*<sub>6</sub>, 400 MHz).

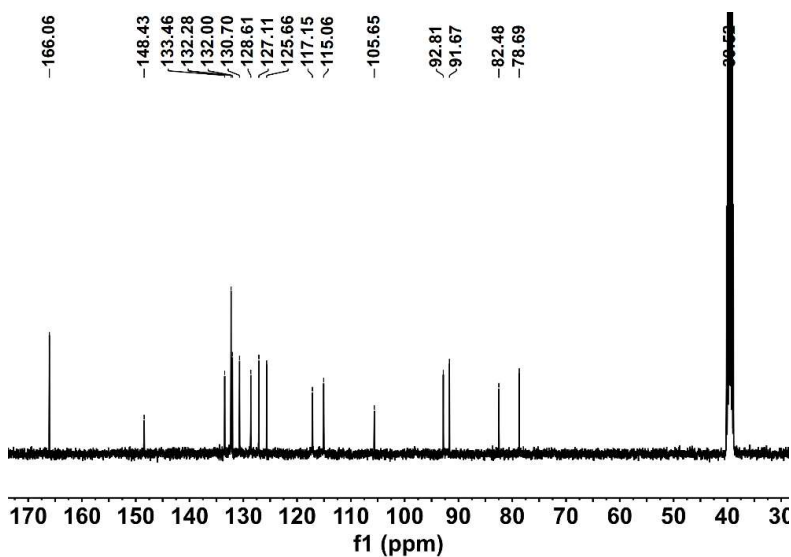

Fig. S10. The <sup>13</sup>C NMR spectrum of H<sub>2</sub>L1 (DMSO-*d*<sub>6</sub>, 100 MHz).

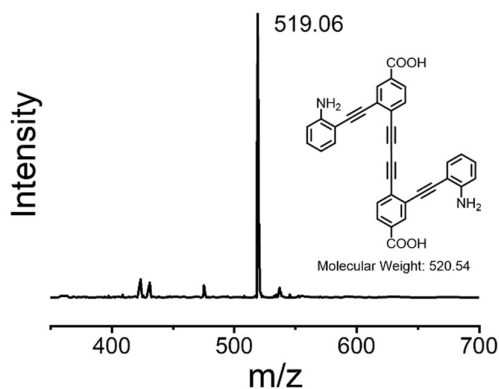

Fig. S11. A mass spectrum (ESI) of compound H<sub>2</sub>L1.

### Synthesis and activation of ZrL1.

H<sub>2</sub>L1 (3 mg, 5.77 mmol) and ZrCl<sub>4</sub> (1.6mg, 6.86 mmol) was loaded into a glass tube. Then HCOOH (24  $\mu$ L) and *N,N*-dimethylformamide (DMF, 300  $\mu$ L) mixed solution was added and the tube was sealed with an oxyhydrogen flame. The glass tube was placed in an oven at 90  $^{\circ}$ C for 48 hours, during which crystalline solid slowly formed. After the sealed tube was heated for 48 hours, it was cooled to room temperature over 4 hours. The yellow crystalline solid were collected and washed with DMF (15 mL) and acetone (15 mL) and air-dried to obtain yellow ZrL1 crystalline solid. For elemental analysis, the ZrL1 (50 mg) were activated *via* Soxhlet extraction with acetonitrile for three days, and then placed in vacuum at 80  $^{\circ}$ C for 10 hours. Elemental analysis found C (44.65%), H (3.17%) and N (2.78%) for ZrL1, this analysis fits the formula to be Zr<sub>6</sub>O<sub>4</sub>(OH)<sub>4</sub>(HCOO)<sub>7</sub>(C<sub>34</sub>H<sub>18</sub>N<sub>2</sub>O<sub>4</sub>)<sub>2.5</sub>(H<sub>2</sub>O)<sub>11</sub> ( $M_w$  2488.97), which gives a calculated profile of C (44.40%), H (3.16%) and N (2.81%).

### Structure simulation.

The structure model of ZrL1 was constructed by the secondary building block of 6-connected [Zr<sub>4</sub>O<sub>4</sub>(OH)<sub>4</sub>] and 2-connected ditopic L1<sup>2-</sup> in reference to MOFs bearing **hxl** topology.<sup>2-5</sup> Using Materials Studio (v6.1.0) suit of programs by Accelrys, the model of ZrL1 was generated with  $P\bar{3}$  space group (No. 147) before replacing the linker (including the cell parameters and atomic positions) and subsequently Geometry Optimization by Forcite Calculation was carried out. To modify the lattice parameters to match the observed PXRD, Pawley refinement procedure was used, leading to trigonal lattice with  $a = b = 23.938$   $\text{\AA}$ ,  $c = 9.537$   $\text{\AA}$ ,  $\alpha = \beta = 90^{\circ}$ ,  $\gamma = 120^{\circ}$ . Instrumental peak broadening parameters and additional profile parameters, background and crystallite size broadening were also used in the refinement to obtain the resultant structural model of ZrL1. The  $R_{wp}$  and  $R_p$  are equal to 4.54% and 2.80%, respectively (Fig. 2c).

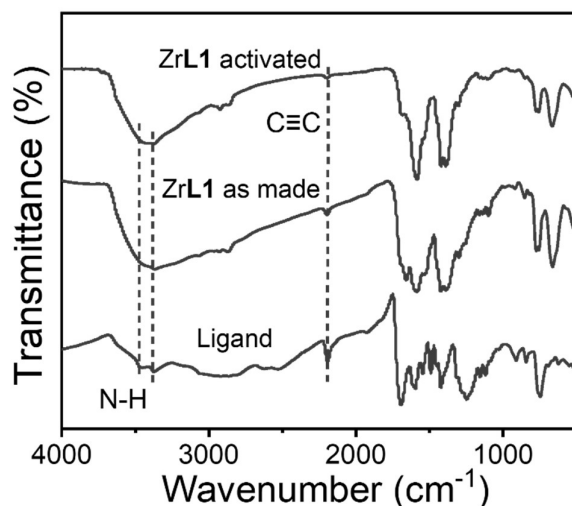

**Fig. S12.** FT-IR spectra of ligand, as made sample of ZrL1 and activated sample of ZrL1.

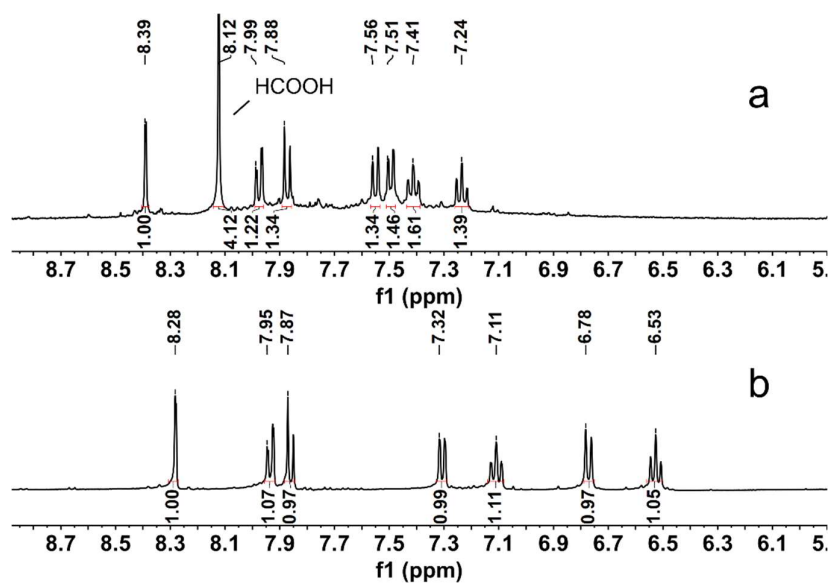

**Fig. S13.**  $^1\text{H}$  NMR spectra of: (a) the filtrate of ZrL1 digested in HF/DMSO- $d_6$ ; (b) H<sub>2</sub>L1 in DMSO- $d_6$ .

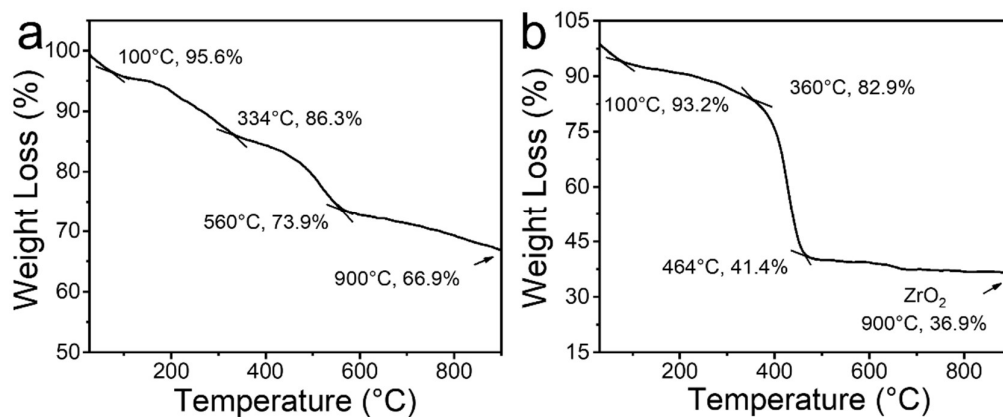

**Fig. S14.** Thermogravimetric analysis (TGA) plots of activated ZrL1 (a) in N<sub>2</sub> and (b) in air.

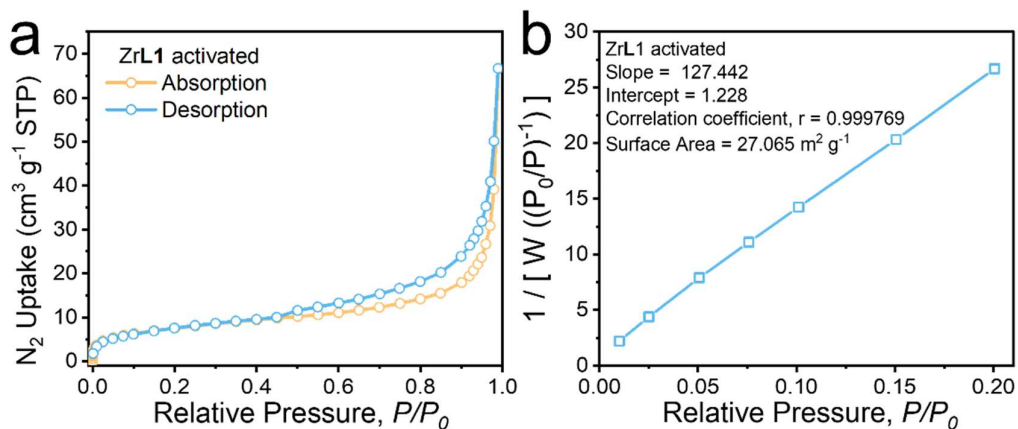

**Fig. S15.** (a)  $N_2$  sorption isotherm at 77 K and (b) BET plot for activated ZrL1 (outgassed at 100 °C under vacuum for 12 hours).  $N_2$  sorption isotherm of ZrL1 reveals a type-II gas sorption isotherm and QSDFT analysis gives BET surface area of 27.065  $m^2 g^{-1}$ .

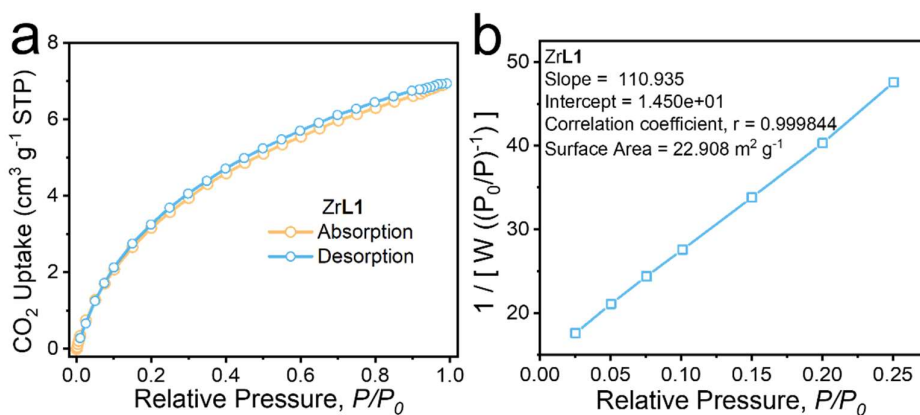

**Fig. S16.** (a)  $CO_2$  sorption isotherm at 175 K and (b) BET plot for activated ZrL1 (outgassed at 100 °C under vacuum for 12 hours).  $CO_2$  sorption isotherm of ZrL1 reveals a type-II gas sorption isotherm and QSDFT analysis gives BET surface area of 22.908  $m^2 g^{-1}$ .

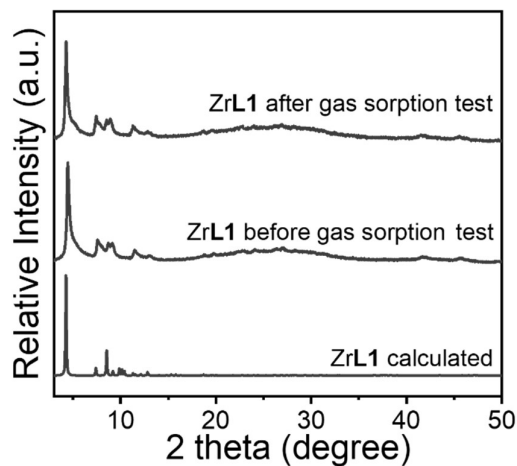

**Fig. S17.** PXRD patterns (Cu  $K\alpha$ ,  $\lambda = 1.5418 \text{ \AA}$ ) of ZrL1 before and after gas sorption measurement.

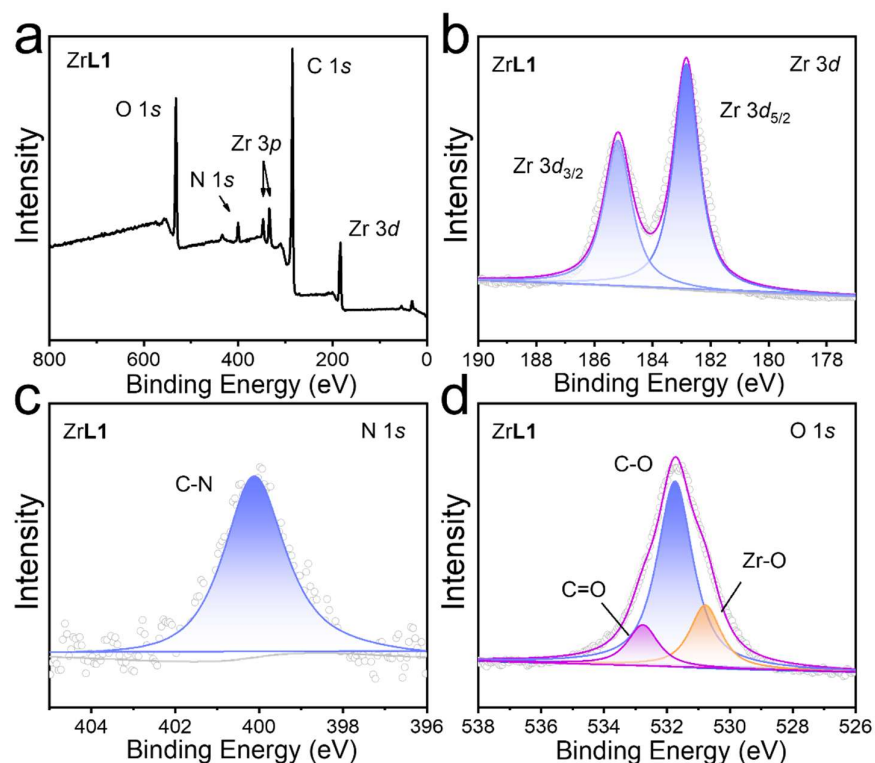

**Fig. S18.** XPS spectra of ZrL1: (a) Full region; (b) Zr 3d region; (c) N 1s region; (d) O 1s region. The powder samples were ground and pressed to form a thin pellet ( $\sim 0.5 \times 0.5 \text{ cm}^2$ ).

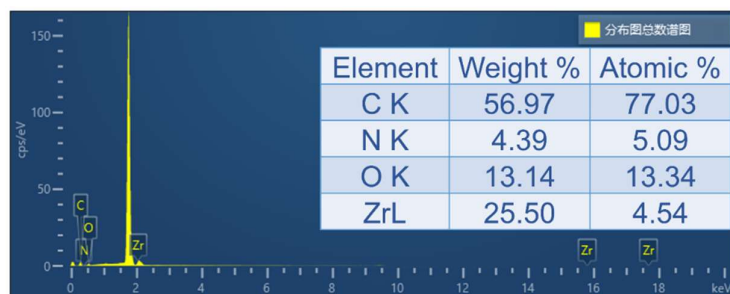

**Fig. S19.** EDS elemental analysis results of ZrL1.

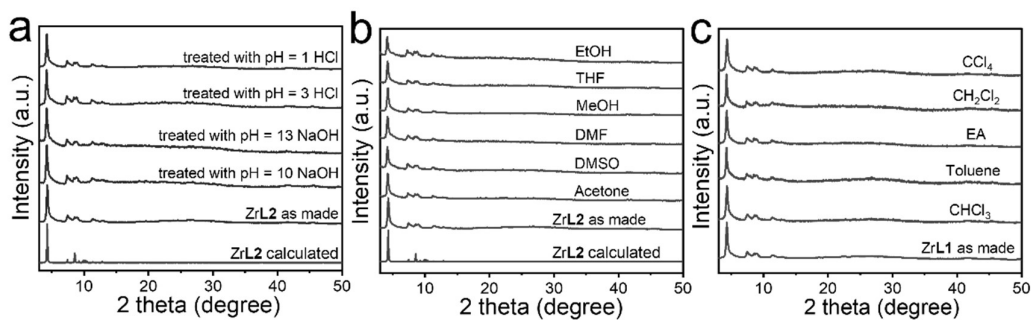

**Fig. S20.** PXRD patterns ( $\text{Cu K}\alpha$ ,  $\lambda = 1.5418 \text{ \AA}$ ) of as made ZrL1 sample immersed in aqueous solutions of (a) pH = 1 and 3 (prepared by HCl solution), 10 and 13 (prepared by NaOH solution); (b, c) different solvents at room temperature for 24 hours.

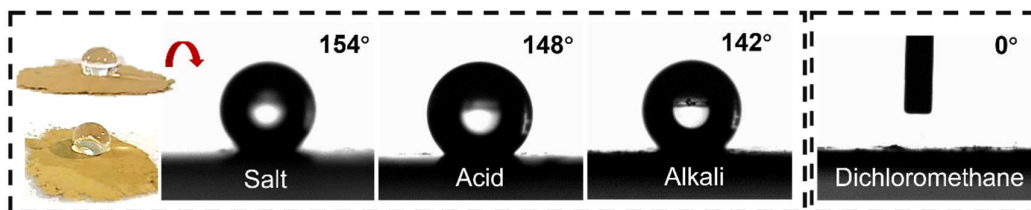

**Fig. S21.** Photographs of the droplets of saline water (3.5 wt.% NaCl, pH = 7), acidic solution (0.01 M HCl, pH = 2), alkaline solution (0.01 M NaOH, pH = 12) and dichloromethane on ZrL1 powder with contact angle values.

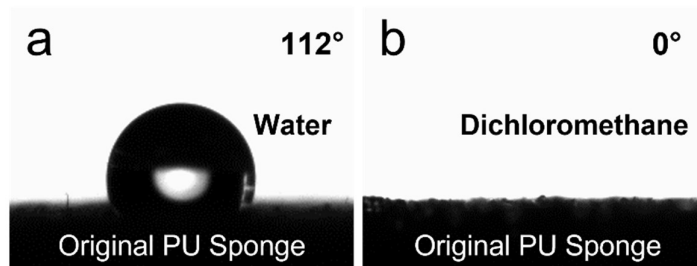

**Fig. S22.** Digital photographs of droplet profiles on the surface of original PU sponge with contact angle values.

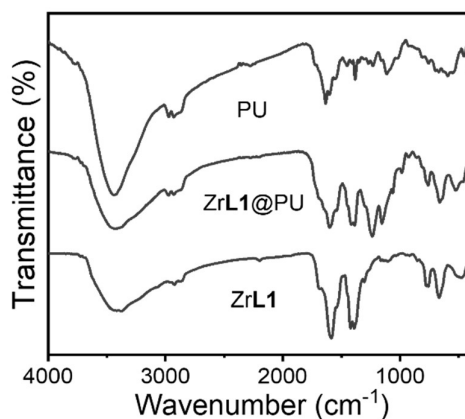

**Fig. S23.** FT-IR spectra of ZrL1, PU and ZrL1@PU.

**Table S1.** Loading of ZrL1@PU.

| ZrL1  | $w_0$ (g) | $w_1$ (g) | Loading content (wt.%) |
|-------|-----------|-----------|------------------------|
| 10 mg | 0.0798    | 0.1048    | 20.6                   |
| 20 mg | 0.0872    | 0.1157    | 31.1                   |
| 30 mg | 0.0863    | 0.1305    | 48.0                   |

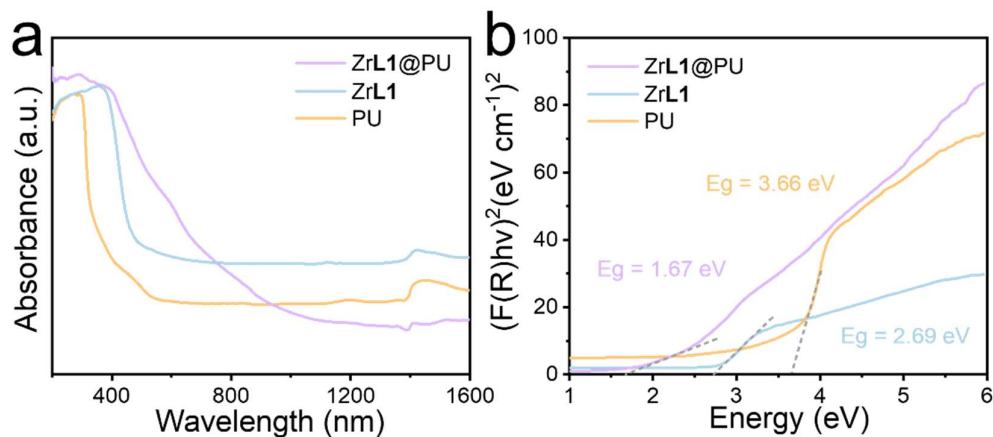

**Fig. S24.** (a, b) Kubelka-Munk-transformed reflectance spectra for solid samples of PU, ZrL1, ZrL1@PU.

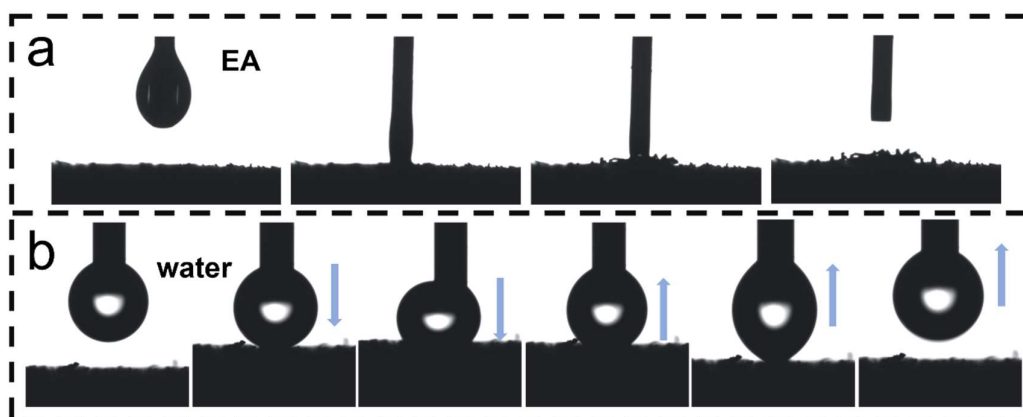

**Fig. S25.** The compression and detachment of (a) organic droplets and (b) water droplets on the surface of ZrL1@PU.

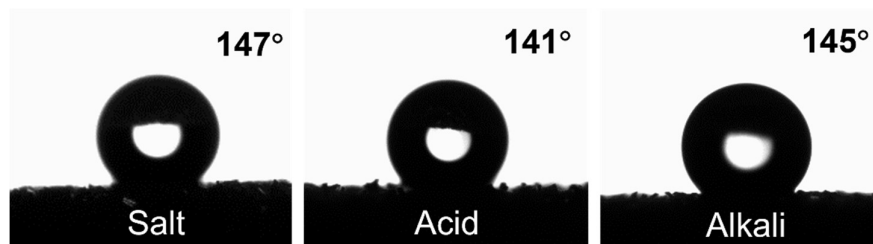

**Fig. S26.** Photographs of the droplets of saline water (3.5 wt.% NaCl, pH = 7), acidic solution (0.01 M HCl, pH = 2), alkaline solution (0.01 M NaOH, pH = 12) on ZrL1@PU with contact angle values.



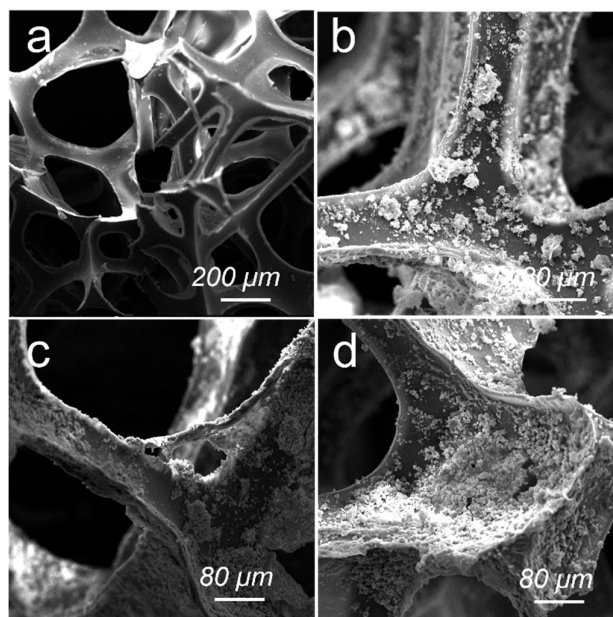

**Fig. S27.** SEM images of original PU Sponge (a) and ZrL1@PU samples with different loadings of ZrL1 (10.0, 20.0 and 30.0 mg loadings for b, c and d).

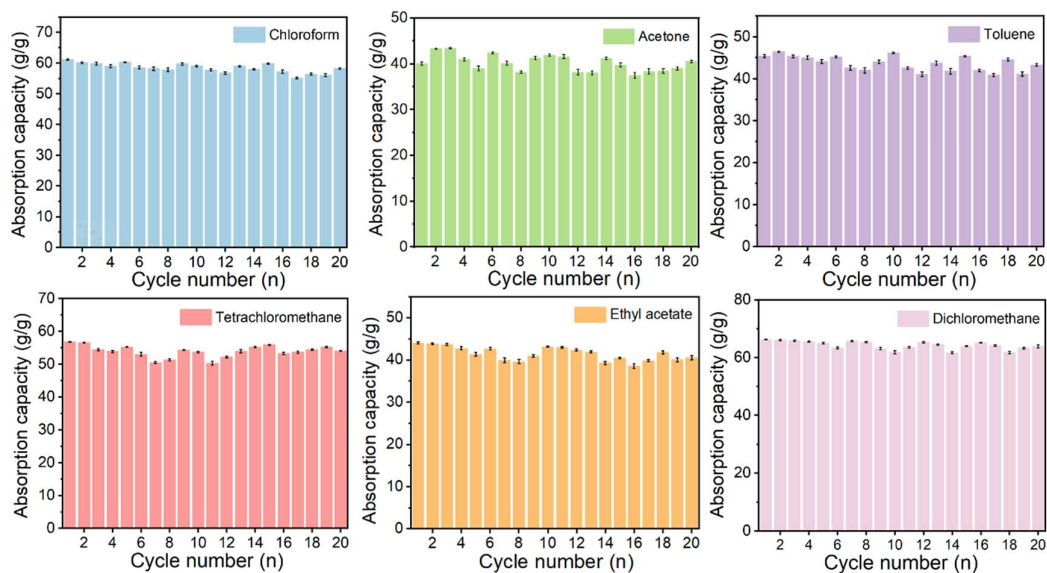

**Fig. S28.** Organic solvent-absorption capacities of the ZrL1@PU (the errors estimated to vary from  $\pm 1.4\%$  to  $\pm 3.2\%$ ).

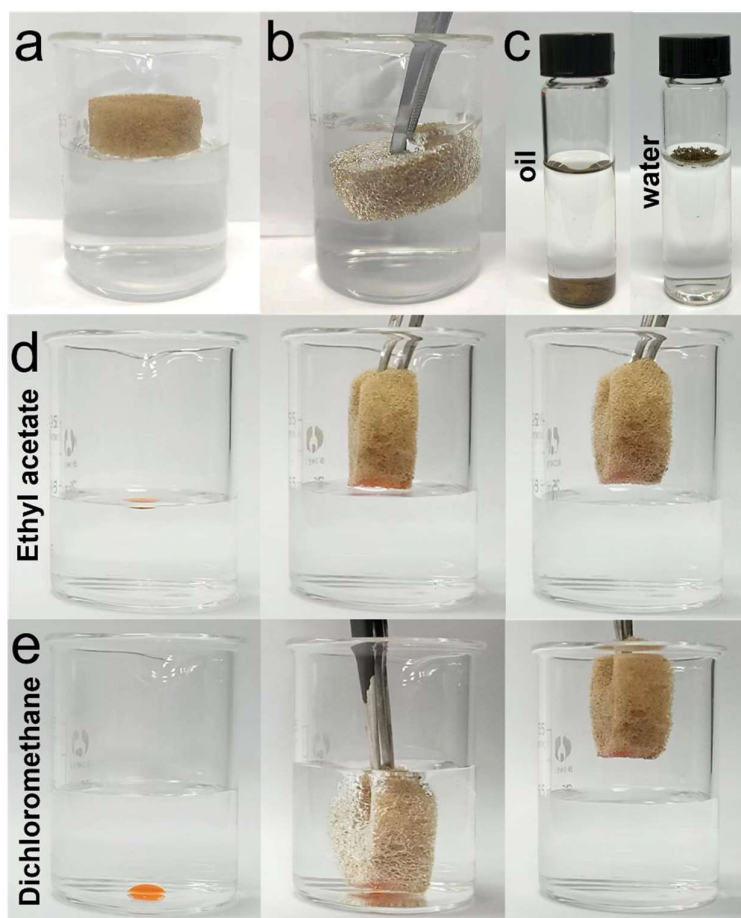

**Fig. S29.** (a, b) Photographs of ZrL1@PU in water; (c) Photograph of ZrL1 powder in water and oil phase; Photographs showing the absorption of ethyl acetate (d) and dichloromethane (e) from water by ZrL1@PU.

**Table S2.** Absorption capacity, separation efficiency and flux of different kinds of oil.

| Oil Types          | Absorption capacity (g/g) | Separation efficiency (%) | Flux ( $L m^{-2} h^{-1}$ ) |
|--------------------|---------------------------|---------------------------|----------------------------|
| Chloroform         | 61.09                     | 99.3                      | 5340                       |
| Acetone            | 43.43                     | 96.2                      | 3956                       |
| Tetrachloromethane | 56.78                     | 98.0                      | 4611                       |
| Ethyl acetate      | 44.03                     | 96.7                      | 4420                       |
| Toluene            | 46.41                     | 97.7                      | 4570                       |
| Dichloromethane    | 66.19                     | 98.8                      | 4788                       |

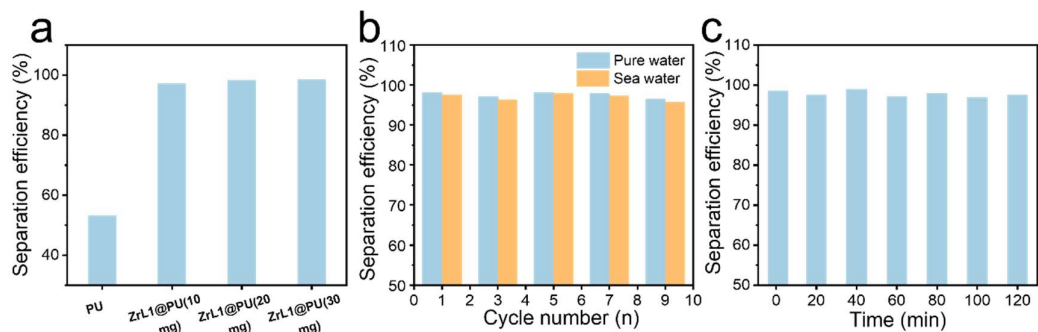

**Fig. S30.** The separation efficiency of (a) ZrL1@PU with different loadings in dichloromethane/water mixture; (b) dichloromethane/pure water or dichloromethane/sea water mixture for 9 cycles of separation; (c) ZrL1@PU in dichloromethane/water mixture as a function of operation time duration (the errors estimated to vary from  $\pm 1.6\%$  to  $\pm 4.4\%$ ).

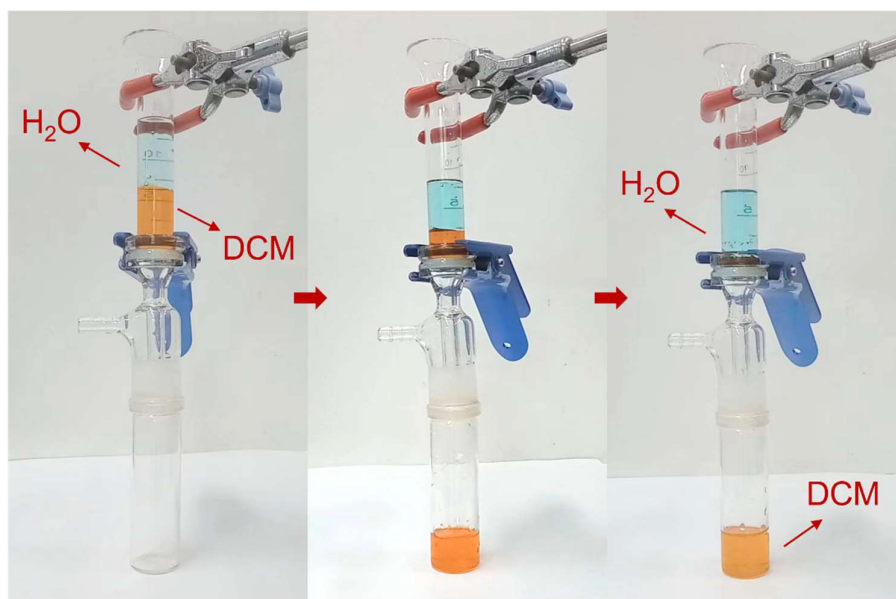

**Fig. S31.** The dichloromethane-water mixture separation process.

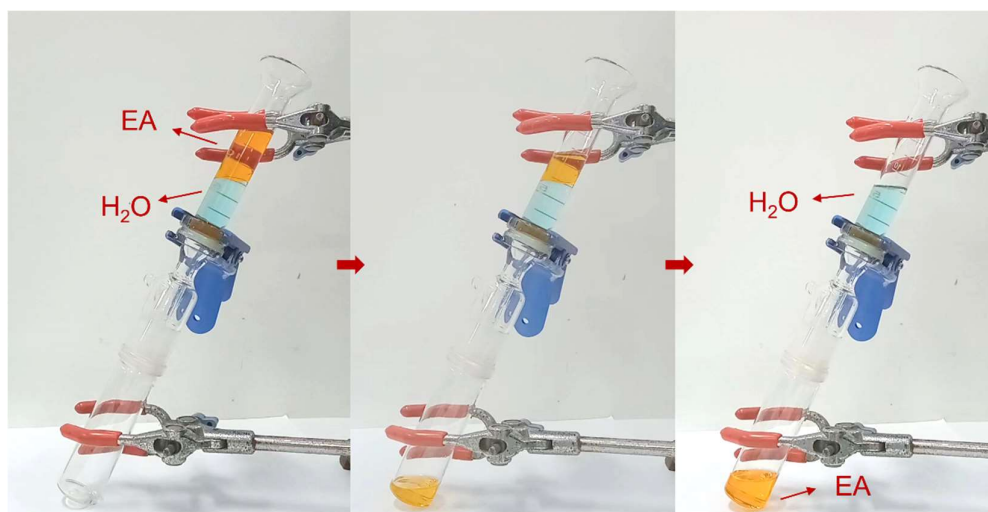

Fig. S32. The ethyl acetate-water mixture separation process.

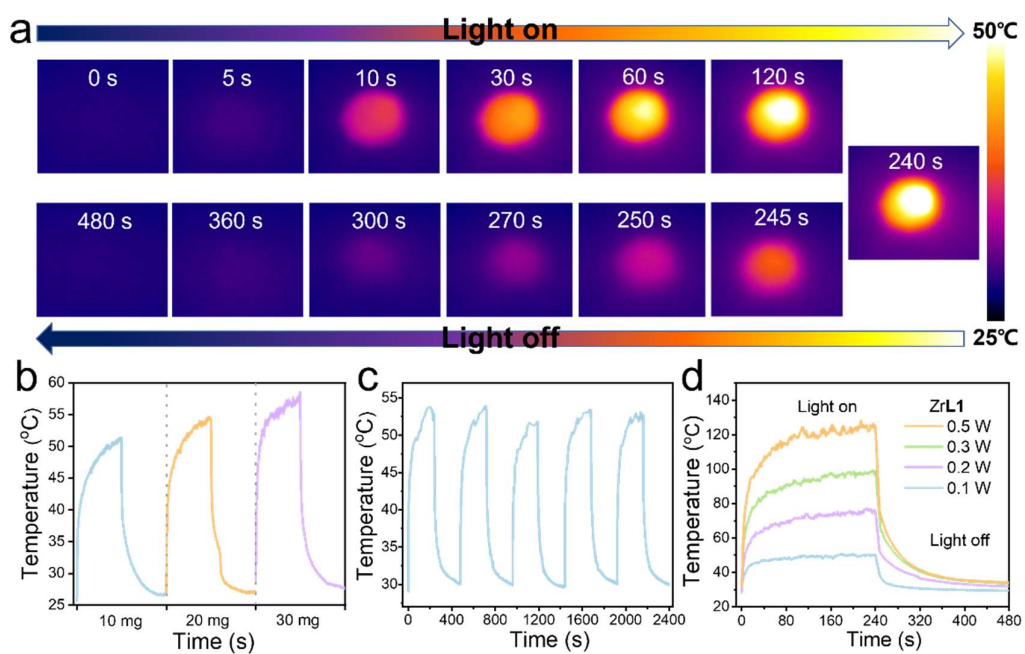

Fig. S33. (a) IR thermal images of ZrL1 under xenon lamp ( $1.0 \text{ kW m}^{-2}$ ); (b) Photothermal conversion behaviour of ZrL1 (different amounts) under one-sun irradiation within eight minutes; (c) Anti-photobleaching property of ZrL1 during five cycles of heating-cooling; (d) Photothermal conversion behaviour of ZrL1 under different light intensities ( $1.0, 2.0, 3.0$  and  $5.0 \text{ kW m}^{-2}$ ).

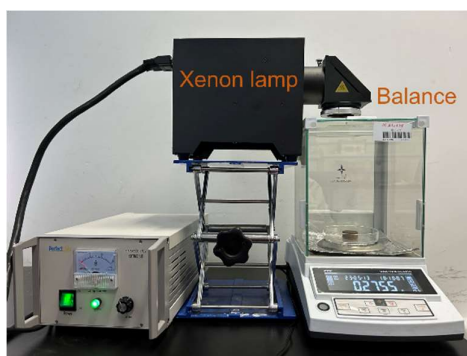

**Fig. S34.** Schematic diagram of photo-driven solvent evaporation experimental set-up.

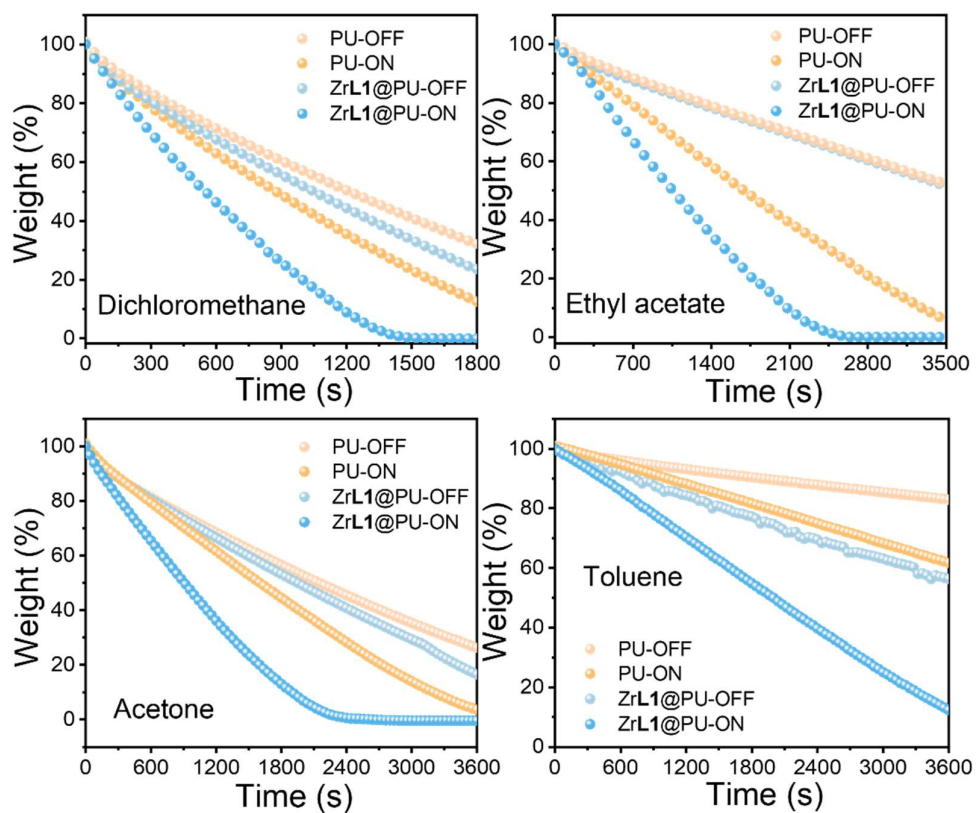

**Fig. S35.** Photo-driven distillation tests of ZrL1@PU. Weight variations of PU or ZrL1@PU saturated by dichloromethane, ethyl acetate, acetone and toluene with/without the light illumination at a power density of  $1.0 \text{ kW m}^{-2}$ .

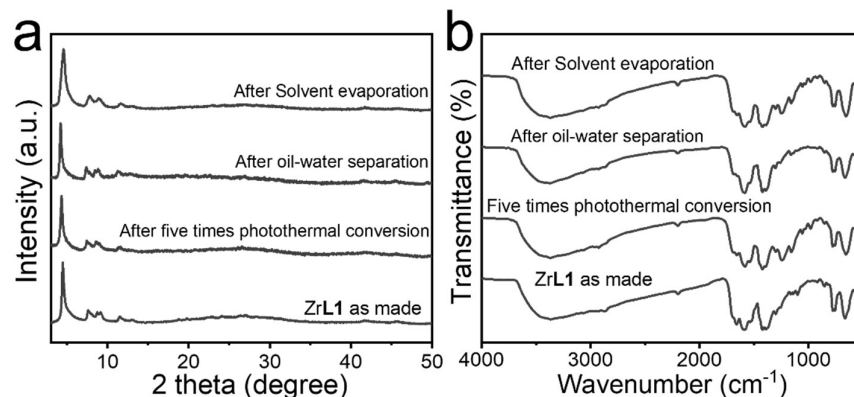

**Fig. S36.** (a) FT-IR spectra and (b) PXRD patterns of ZrL1 recovered from ZrL1@PU by ultrasonication after five photothermal conversion cycles, oil/water separation and 20 cycles of solvent evaporation experiment.

**Table S3.** Comparisons of absorption capacities (in g/g) and separation efficiency (%) of some absorbents with ZrL1@PU

| S. No. | Absorbents                                                | Absorption substances                                                                                                                       | Absorption capacity (g/g) | Separation efficiency (%) | Ref.             |
|--------|-----------------------------------------------------------|---------------------------------------------------------------------------------------------------------------------------------------------|---------------------------|---------------------------|------------------|
| 1      | ZrL1@PU                                                   | chloroform, acetone, diethyl ether, dichloromethane, toluene, tetrachloromethane, <i>n</i> -hexane                                          | 43.43–66.19               | 96.2–99.3                 | <b>This work</b> |
| 2      | SEnS                                                      | crude oil                                                                                                                                   | 22.59                     | 90–99                     | Ref. 6           |
| 3      | SHMOF-PP                                                  | diesel oil, petrol oil, kerosene, crude oil, dichloromethane, chloroform, carbon tetrachloride, ethyl acetate, hexane, toluene              | 28.28–38.93               | 95–99                     | Ref. 7           |
| 4      | cotton fibre modified via the solgel method               | diesel oil, lubrication oil, crude oil, peanut oil                                                                                          | 25.61–57.01               | 98.5                      | Ref. 8           |
| 5      | modified jute fibre via the sol-gel method                | crude oil, diesel oil, lubricating oil, peanut oil                                                                                          | 7.41–10.29                | –                         | Ref. 9           |
| 6      | PDMS/CB@PU                                                | pump oil, edible oil, dichloromethane, toluene, ethyl acetate, hexamethylene, <i>n</i> -octane, ethyl alcohol, petroleum ether, isopropanol | 28.5–68.7                 | >95                       | Ref. 10          |
| 7      | polystyrene branched 9-octadecenoic acid grafted graphene | hexane, heptane, nonane, decane, hexadecane                                                                                                 | 11.00–27.00               | –                         | Ref. 11          |

|    |                                               |                                                                                                                                                          |              |       |         |
|----|-----------------------------------------------|----------------------------------------------------------------------------------------------------------------------------------------------------------|--------------|-------|---------|
| 8  | MOF-PU sponge                                 | <i>n</i> -hexane, paraffin, ethanol, edible oil, DMF, carbon tetrachloride                                                                               | 29.00–56.00  | >96   | Ref. 12 |
| 9  | UiO-66-F <sub>4</sub> @rGO/MS                 | <i>n</i> -hexane, isooctane, dichloromethane, 1,3,5-trimethylbenzene, silicone oil, diesel oil, light diesel oil, crude oil                              | 26.00–61.00  | 99.73 | Ref. 13 |
| 10 | MOF@RGO composites                            | chloroform, <i>n</i> -hexane, silicone oil, bump oil, bean oil, toluene, acetone, butanone                                                               | 14.00–37.00  | 50–80 | Ref. 14 |
| 11 | MOFs-copper foam                              | soybean oil, <i>n</i> -hexane, isooctane, gasoline, dichloromethane, chloroform                                                                          | 1.50–3.50    | >96   | Ref. 15 |
| 12 | Macroporous silicone sponges                  | crude oil, sunflower oil, kerosene, diesel, alcohol, acetic acid, chloroform, acetone, diethyl ether, <i>n</i> -hexane, isooctane, dichloromethane       | 9.70–27.00   | >99   | Ref. 16 |
| 13 | PVDF/SiO <sub>2</sub> @GO nanofibrous aerogel | <i>n</i> -Hexane, kerosene, toluene, cooking oil, dichloromethane, chloroform                                                                            | 129–264      | >99   | Ref. 17 |
| 14 | ZIF-8-PDA-Ag@MS                               | <i>n</i> -hexane, cyclohexane, dodecane, acetone, toluene, tetrahydrofuran, chloroform, chlorobenzene, diesel oil, pump oil, silicone oil, and corn oil. | 85.45–168.95 | >94   | Ref. 18 |
| 15 | SH-UiO-66@CFs                                 | motor oil, silicone oil, gasoline, kerosene, toluene, hexane, ethyl acetate, carbon tetrachloride, chloroform, dichloromethane                           | 27.14–49.27  | 95–98 | Ref. 19 |

## References.

1. Q. Xiao, M. Lu, Y. Deng, J.-X. Jian, Q.-X. Tong and J.-J. Zhong, *Org. Lett.*, 2021, **23**, 9303–9308.
2. J. Jia, A. J. Blake, N. R. Champness, P. Hubberstey, C. Wilson and M. Schröder, *Inorg. Chem.*, 2008, **47**, 8652–8664.
3. H. L. Nguyen, F. Gándara, H. Furukawa, T. L. H. Doan, K. E. Cordova and O. M. Yaghi, *J. Am. Chem. Soc.*, 2016, **138**, 4330–4333.
4. V. Sharma, D. De, S. Pal, P. Saha and P. K. Bharadwaj, *Inorg. Chem.*, 2017, **56**, 8847–8855.
5. W. Lin, E. Ning, L. Yang, Y. Rao, S. Peng and Q. Li, *Inorg. Chem.*, 2021, **60**, 11756–11763.
6. P. Cherukupally, W. Sun, A. P. Y. Wong, D. R. Williams, G. A. Ozin, A. M. Bilton and C. B. Park, *Nat. Sustain.*, 2020, **3**, 136–143.
7. C. Gogoi, A. Rana, S. Ghosh, R. Fopase, L. M. Pandey and S. Biswas, *ACS Appl. Nano Mater.*, 2022, **5**, 10003–10014.
8. N. Lv, X. Wang, S. Peng, L. Luo and R. Zhou, *RSC Adv.*, 2018, **8**, 30257–30264.
9. N. Lv, X. Wang, S. Peng, H. Zhang and L. Luo, *Int. J. Environ. Res. Public Health*, 2018, **15**, 969.
10. J. Chen, M. Sun, Y. Ni, T. Zhu, J. Haung, X. Li and Y. Lai, *J. Hazard. Mater.*, 2023, **445**, 130541.
11. F. I. Alghunaimi, D. J. Alsaeed, A. M. Harith and T. A. Saleh, *J. Clean. Prod.*, 2019, **233**, 946–953.
12. Z. He, H. Wu, Z. Shi, X. Duan, S. Ma, J. Chen, Z. Kong, A. Chen, Y. Sun and X. Liu, *Colloids Surf. A: Physicochem. Eng. Asp.*, 2022, **648**, 129142.
13. Y. Zhan, S. He, J. Hu, S. Zhao, G. Zeng, M. Zhou, G. Zhang and A. Sengupta, *J. Hazard. Mater.*, 2020, **388**, 121752.
14. J. Gu, H. Fan, C. Li, J. Caro and H. Meng, *Angew. Chem. Int. Ed.*, 2019, **58**, 5297–5301.
15. J. Du, C. Zhang, H. Pu, Y. Li, S. Jin, L. Tan, C. Zhou and L. Dong, *Colloids Surf. A: Physicochem. Eng. Asp.*, 2019, **573**, 222–229.
16. J. Cao, D. Wang, P. An, J. Zhang and S. Feng, *J. Mater. Chem. A*, 2018, **6**, 18025–18030.
17. X. Wang, Z. Liu, X. Liu, Y. Su, J. Wang, T. Fan, X. Ning, S. Ramakrishn and Y.-Z. Long, *Carbon*, 2022, **193**, 77–87.
18. Y. Zhang, S. Hou, H. Song, G. Qin, P. Li, K. Zhang, T. Li, L. Han, W. Liu and S. Ji, *J. Hazard. Mater.*, 2023, **451**, 131064.
19. R. Dalapati, S. Nandi, C. Gogoi, A. Shome and S. Biswas, *ACS Appl. Mater. Interfaces*, 2021, **13**, 8563–8573.
